# Supplementary material
Source: PubMed Central journal article supplement (PMC9574470)
Supplement: NIHMS1837330-supplement-1.pdf [file NIHMS1837330-supplement-1.pdf]

## Appendix A

### PubMed

((("Probiotics"[Mesh] OR Probiotic\* OR "Gastrointestinal Agents"[Mesh] OR "Gastrointestinal Agents" OR "gastrointestinal agent" OR "Gastrointestinal Drugs" OR "Gastrointestinal Drug" OR "Gastric Agents" OR "Gastric Drugs" OR "gastric drug" OR Digestants OR Digestant OR "Prebiotics"[Mesh] OR Prebiotic\* OR "Synbiotics"[Mesh] OR Synbiotic\* OR "Lactobacillus"[Mesh] OR Lactobacillus OR "Bifidobacterium"[Mesh] OR "Bifidobacterium" OR "Saccharomyces"[Mesh] OR Saccharomyce\* OR "Enterococcus"[Mesh] OR Enterococcus OR "Saccharomyces boulardii"[Mesh] OR "Saccharomyces boulardii" OR "Bacillus"[Mesh] OR Bacillus)) AND ("Pregnancy"[Mesh] OR pregnant OR Pregnancy OR Pregnancies OR Gestation\* OR "Pregnant Women"[Mesh] OR "pregnant women" OR "pregnant woman" OR "Prenatal Care"[Mesh] OR "prenatal care" OR Antepartum OR Prenatal\* OR Antenatal\* OR "antenatal care" OR "Perinatal Care"[Mesh] OR "perinatal care")) AND ("Bsp protein, group B streptococcus" [Supplementary Concept] OR "FemH protein, group B Streptococcus" [Supplementary Concept] OR "Group B Streptococcus" OR "Streptococcus Agalactiae" OR "Streptococcus Group B" OR "Group B Streptococcal Infections" OR "Group B Strep Infection" OR "Group B Streptococcal Infection" OR "GBS colonization" OR "Streptococcal Infections"[Mesh] OR "Streptococcal Infection")) AND (prevent\* OR Control OR Transmission\* OR Transmit\* OR "Infectious Disease Transmission, Vertical"[Mesh] OR "Vertical Pathogen Transmission" OR "Vertical Transmission of Infectious Disease" OR "Vertical Infection Transmission" OR "Vertical Infectious Disease Transmission" OR "Maternal-Fetal Infection Transmission" OR "Maternal Fetal Infection Transmission" OR "Mother-to-Child Transmission" OR "Mother to Child Transmission" OR "Mother-to-Child Transmissions")

Filters: English

CINAHL (Cumulative Index to Nursing and Allied Health)

((("MH "Probiotics") OR "Pro-Biotic\*" OR Probiotic\* OR (MH "Gastrointestinal Agents") OR "Gastrointestinal Agent\*" OR "Gastrointestinal Drug\*" OR "Gastrointestinal Med\*" OR "Gastric gent\*" OR "Gastric Drug\*" OR Digestant\* OR (MH "Prebiotics") OR Prebiotic\* OR Synbiotic\* OR (MH "Lactobacillus") OR Lactobacillus OR (MH "Bifidobacterium") OR Bifidobact\* OR (MH "Saccharomyces") OR Saccharomyce\* OR (MH "Enterococcus") OR Enterococcus OR Streptococcus OR "Saccharomyces boulardii" OR (MH "Bacillus") OR Bacillus OR Thiobacillus) AND ((MH "Pregnancy") OR Pregnant\* OR Gestation\* OR (MH "Expectant Mothers") OR "pregnant women" OR "pregnant woman" OR "Expect\* Mother\*" OR (MH "Prenatal Care") OR "prenatal care" OR Antepartum OR Prenatal\* OR Antenatal\* OR "antenatal care" OR (MH "Perinatal Care") OR "perinatal care") AND ("Bsp protein, group B streptococcus" OR "Group B Streptococcus" OR "Streptococcus Agalactiae" OR "Streptococcus Group B" OR "Group B Strep\* Infect\*" OR "GBS colonization" OR (MH "Streptococcal Infections") OR "strep\* infect\*")) AND (prevent\* OR Control OR Transmission\* OR Transmit\* OR (MH "Disease Transmission, Vertical") OR "Maternal-Fetal Transmission" OR "Perinatal Disease Transmission" OR "Perinatal Transmission" OR "Vertical Disease Transmission" OR "Vertical Transmission" OR "Vertical Pathogen Transmission" OR "Vertical Transmission of Infectious Disease" OR "Vertical Infection Transmission" OR "Vertical Infectious Disease Transmission" OR "Maternal Fetal Infection Transmission" OR "Mother-to-Child Transmission\*" OR "Mother to Child Transmission\*"))

Limiters – English Language

Cochrane Library

"Pro-Biotic\*" OR Probiotic\* OR "Gastrointestinal Agent\*" OR "Gastrointestinal Drug\*" OR "Gastrointestinal Med\*" OR "Gastric Agent\*" OR "Gastric Drug\*" OR Digestant\* OR Prebiotic\* OR Synbiotic\* OR Lactobacillus OR Bifidobact\* OR Saccharomyce\* OR Enterococcus OR Streptococcus OR "Saccharomyces boulardii" OR Bacillus OR Thiobacillus in Title Abstract Keyword AND Pregnant\* OR Gestation\* OR "pregnant women" OR "pregnant woman" OR "Expect\* Mother\*" OR "antenatal care" OR Antepartum OR Prenatal\* OR Antenatal\* OR "antenatal care" OR "perinatal care" in Title Abstract Keyword AND "Bsp protein, group B streptococcus" OR "Group B Streptococcus" OR "Streptococcus Agalactiae" OR "Streptococcus Group B" OR "Group B Strep\* Infect\*" OR "GBS colonization" OR "strep\* infect\*" in Title Abstract Keyword AND prevent\* OR Control OR Transmission\* OR Transmit\* OR "Maternal-Fetal Transmission" OR "Perinatal Disease Transmission" OR "Perinatal Transmission" OR "Vertical Disease Transmission" OR "Vertical Transmission" OR "Vertical Pathogen Transmission" OR "Vertical Transmission of Infectious Disease" OR "Vertical Infection Transmission" OR "Vertical Infectious Disease Transmission" OR "Maternal Fetal Infection Transmission" OR "Mother-to-Child Transmission\*" OR "Mother to Child Transmission\*" in Title Abstract Keyword - (Word variations have been searched)

Web of Science

**TOPIC:** (Probiotic\* OR "gastrointestinal agent\*" OR "Gastrointestinal Drug\*" OR "Gastric Agent\*" OR "Gastric Drug\*" OR Digestant\* OR Prebiotic\* OR Synbiotic\* OR Lactobacillus OR "Bifidobacterium" OR Saccharomyce\* OR Enterococcus OR "Saccharomyces boulardii" OR Bacillus) AND **TOPIC:** (Pregnant\* OR Gestation\* OR "pregnant women" OR "pregnant woman" OR "prenatal care" OR Antepartum OR Prenatal\* OR Antenatal\* OR "antenatal care" OR "perinatal care") AND **TOPIC:** ("Group B Streptococcus" OR "Streptococcus Agalactiae" OR "Streptococcus Group B" OR "Group B Streptococcal Infection\*" OR "Group B Strep Infection\*" OR "GBS colonization" OR "Streptococcal Infection\*") AND **TOPIC:** (prevent\* OR control OR Transmission\* OR Transmit\* OR "Vertical Pathogen Transmission" OR "Vertical Transmission of Infectious Disease\*" OR "Vertical Infection Transmission\*" OR "Vertical Infectious Disease Transmission\*" OR "Maternal-Fetal Infection Transmission\*" OR "Maternal Fetal Infection Transmission\*" OR "Mother-to-Child Transmission\*" OR "Mother to Child Transmission\*")

**Timespan:** All years. **Indexes:** SCI-EXPANDED, SSCI, A&HCI, ESCI.

English
